1 **Title:** Barth syndrome cellular models have dysregulated respiratory chain complex I and  
2 mitochondrial quality control due to abnormal cardiolipin

3  
4 **Authors:** Arianna F. Anzmann<sup>a</sup> (ORCID:0000-0002-7368-6918), Olivia L. Sniezek<sup>a</sup>  
5 (ORCID:0000-0002-6435-2852), Alexandra Pado<sup>a</sup> (ORCID:0000-0003-2018-0662), Veronica  
6 Busa<sup>a</sup> (ORCID:0000-0002-3981-9975), Frédéric Maxime Vaz<sup>b</sup> (ORCID:0000-0002-9048-1041),  
7 Simion D. Kreimer<sup>c</sup> (ORCID:0000-0001-6627-3771), Robert Norman Cole<sup>c</sup> (ORCID:0000-0002-  
8 3096-4754), Anne Le<sup>d</sup> (ORCID:0000-0002-2958-8149), Brian James Kirsch<sup>d</sup> (ORCID:0000-  
9 0001-9984-4438), Steven M. Claypool<sup>e</sup> (ORCID:0000-0001-5316-1623), Hilary J.  
10 Vernon<sup>a\*</sup> (ORCID:0000-0001-9940-9866)

11  
12 <sup>a</sup> Department of Genetic Medicine, Johns Hopkins University School of Medicine, Baltimore,  
13 Maryland, USA

14 <sup>b</sup> Department of Clinical Chemistry and Pediatrics, Academic Medical Center, Amsterdam, The  
15 Netherlands

16 <sup>c</sup> Mass Spectrometry and Proteomics Facility, Department of Biological Chemistry, Johns  
17 Hopkins University School of Medicine, Baltimore, Maryland, USA.

18 <sup>d</sup> Department of Pathology and Oncology, Johns Hopkins University School of Medicine,  
19 Baltimore, Maryland, USA

20 <sup>e</sup> Department of Physiology, Johns Hopkins University School of Medicine, Baltimore, Maryland,  
21 USA

22 **Corresponding author at:** Department of Genetic Medicine, Johns Hopkins University School  
23 of Medicine, 733 N Broadway, MRB 512 Baltimore, Maryland, USA. Email: [hvernon1@jhmi.edu](mailto:hvernon1@jhmi.edu)  
24 (H.J. Vernon)

25  
26 **Keywords**

27 Barth syndrome

28 Cardiolipin

29 Proteomics

30 Mitochondria

31 Complex I

32 PARL

33 Mitophagy

34 Apoptosis

35 **Abstract**

36 Barth syndrome (BTHS) is an X-linked genetic condition caused by defects in *TAZ*, which  
37 encodes a transacylase involved in the remodeling of the inner mitochondrial membrane  
38 phospholipid, cardiolipin (CL). As such, CL has been implicated in numerous mitochondrial  
39 functions, and the role of defective CL in the clinical pathology of BTHS is under intense  
40 investigation. We used untargeted proteomics, shotgun lipidomics, gene expression analysis,  
41 and targeted metabolomics to identify novel areas of mitochondrial dysfunction in a new model  
42 of *TAZ* deficiency in HEK293 cells. Functional annotation analysis of proteomics data revealed  
43 abnormal regulation of mitochondrial respiratory chain complex I (CI), driven by the reduced  
44 abundance of 6 CI associated proteins in *TAZ*-deficient HEK293 cells: MT-ND3, NDUFA5,  
45 NDUFAB1, NDUFB2, NDUFB4, and NDUFAF1. This resulted in reduced assembly and function  
46 of CI in *TAZ*-deficient HEK293 cells as well as BTHS patient derived lymphoblast cells. We also  
47 identified increased abundance of PARL, a rhomboid protein involved in the regulation of  
48 mitophagy and apoptosis, and abnormal downstream processing of PGAM5, another mediator  
49 of mitochondrial quality control, in *TAZ*-deficient cells. Lastly, we modulated CL via the  
50 phospholipase inhibitor bromoenol lactone and the CL targeted SS-peptide, SS-31, and showed  
51 that each is able to remediate abnormalities in CI abundance as well as PGAM5 processing.  
52 Thus, mitochondrial respiratory chain CI and PARL/PGAM5 regulated mitochondrial quality  
53 control, both of whose functions localize to the inner mitochondrial membrane, are dysregulated  
54 due to *TAZ* deficiency and are partially remediated via modulation of CL.

## 55 Introduction

56 Barth syndrome (BTHS, MIM#302060) is a rare X-linked inborn error of mitochondrial  
57 phospholipid metabolism caused by variants in the gene TFAZZIN (*TAZ*) (1–3). *TAZ* encodes  
58 a transacylase essential for the remodeling and maturation of the mitochondrial phospholipid  
59 cardiolipin (CL) (1, 4). CL, primarily localized to inner mitochondrial membrane, has many key  
60 functions, including roles in maintaining mitochondrial cristae structure, organization of  
61 respiratory complexes, protein import, fusion, fission, and cellular signaling (1). *TAZ* deficiency  
62 results in abnormal CL content, including an accumulation of the remodeling intermediate  
63 monolysocardiolipin (MLCL), decreased remodeled CL, and a shift towards saturated CL  
64 species (1, 5). An elevated MLCL:CL ratio is the pathognomonic metabolic defect in BTHS and  
65 is found in 100% of affected individuals (6).

66 BTHS is a multisystem disorder characterized by prenatal onset of left ventricular  
67 noncompaction, early onset cardiomyopathy, skeletal myopathy, growth abnormalities, and  
68 neutropenia among other features, and is the only known Mendelian disorder of CL metabolism  
69 (1, 7–9). Despite knowledge of the primary metabolic defect in BTHS, there is limited knowledge  
70 of downstream mechanisms of cellular pathogenesis, and consequently there is a dearth of  
71 targets for therapeutic intervention and clinical monitoring (10). In addition to BTHS, CL  
72 abnormalities have been described in common conditions such as idiopathic cardiomyopathy,  
73 fatty liver disease, and diabetes (1, 11–14). Consequently, studies in BTHS have the potential to  
74 illuminate pathophysiology in a range of common diseases.

75 To identify novel and unappreciated cellular pathways impacted by *TAZ* deficiency we  
76 employed a discovery-based approach in a new HEK293 *TAZ*-deficient cellular model, starting  
77 with untargeted proteomics followed by functional analysis, and validation of pathways of  
78 interest in both HEK293 *TAZ*-deficient cells and patient derived lymphoblastoid cell lines (LCLs).  
79 With this approach we characterized two major areas of dysfunction in the inner mitochondrial  
80 membrane: complex I (CI) of the mitochondrial respiratory chain and mitochondrial quality  
81 control (MQC).

82 Prior studies seeking to define the mitochondrial pathology of *TAZ* deficiency have  
83 described abnormal assembly and function of the mitochondrial respiratory complexes (15–17).  
84 In agreement with these findings, we identified aberrations in mitochondrial respiratory chain  
85 protein abundance and enzymatic function, specifically in CI. Significantly, our findings show  
86 that *TAZ* deficiency results in the reduced CI mRNA expression with evidence for distinct  
87 regulation in differing cell types.

88 In addition to expanding our current understanding of respiratory chain abnormalities in  
89 TAZ deficiency, we also identified novel abnormalities in regulators of MQC. We uncovered  
90 aberrant abundance of the MQC protein, mature mitochondrial PARL, which was accompanied  
91 by altered cleavage of the downstream MQC mediator and PARL target, PGAM5. PGAM5  
92 cleavage abnormalities were further amplified by uncoupling of mitochondrial oxidative  
93 phosphorylation, suggesting that baseline MQC abnormalities in TAZ-deficient cells can be  
94 exacerbated with additional stress.

95 Finally, we found that modulating CL normalizes gene expression of CI subunits,  
96 normalizes the abundance of CI holoenzyme, and remediates the aberrant ratio of cleaved to  
97 full length PGAM5. Thus, abnormal CL in TAZ deficiency has a direct role in dysregulating both  
98 CI of the mitochondrial respiratory chain and MQC.

99

## 100 **Results**

### 101 **Generation of a HEK293 TAZ-KO model, $TAZ^{\Delta 45}$**

102 We used CRISPR/Cas9 genome editing in HEK293s to create a novel TAZ-deficient cellular  
103 model. Using two single guide RNAs (sgRNAs) targeting exon 2 of *TAZ*, we isolated 3 individual  
104 clones with a resultant 45bp deletion at the 3'- end of exon 2;  $TAZ^{\Delta 45.4}$ ,  $TAZ^{\Delta 45.5}$ ,  $TAZ^{\Delta 45.6}$  (Fig.  
105 S1). The deletion encompasses a predicted acyltransferase domain and covers an area of *TAZ*  
106 where multiple pathological variants have been described, such as p.R57L and p.H69Q (Fig.  
107 S1) (3). The 45bp in-frame deletion is not predicted to result in NMD (Fig. 1A). However, the  
108 deletion resulted in undetectable expression of TAZ in all three clones (Fig. 1B). In the absence  
109 of TAZ there was no significant difference in the abundance of cytosolic and mitochondrial  
110 proteins/immunoblotting controls; GRP75,  $\beta$ -actin, VDAC1, and TOM20 (Fig. S2).

111 Shotgun lipidomics via mass spectrometry revealed a significant decrease in CL, a  
112 significant increase in MLCL, and a significantly increased MLCL:CL ratio ( $p=0.03$ ,  $p=4.9 \times 10^{-5}$ ,  
113  $p=4.6 \times 10^{-6}$ , respectively) (Fig. 1C). TAZ-based remodeling is characterized by the  
114 incorporation of unsaturated acyl chains compared to nascent CL. Of the 31 CL species  
115 assessed, the  $TAZ^{\Delta 45}$  clones had a significant increase in CL containing 1 to 3 double bonds  
116 ( $p=0.007$ ,  $p=1.5 \times 10^{-9}$ ,  $p=7.4 \times 10^{-6}$ , respectively) and a significant decrease in CL containing 4  
117 to 6 double bonds ( $p=0.03$ ,  $p=0.003$ ,  $p=4.2 \times 10^{-9}$ , respectively), highlighting the loss of TAZ-  
118 based remodeling (Fig. 1D). Collectively, the  $TAZ^{\Delta 45}$  clones recapitulate the pathognomonic  
119 metabolic defect of BTHS and validate the  $TAZ^{\Delta 45}$  clones as TAZ-deficient cellular models of  
120 BTHS.

121 We were able to amplify and Sanger sequence 5 of the top 10 predicted off-target sites,  
122 5 off-target sites per sgRNA, which revealed no detectable off-target CRISPR/Cas9 genome  
123 editing activity (Table S1). The other 5 off-target sequences were not able to be amplified likely  
124 due to highly repetitive sequences and/or increased GC base pair content. None of the top 10  
125 predicted off-target sites were located in coding regions. In order to mitigate consequences of  
126 undetected off-target editing in any one of the clones, the clones,  $TAZ^{\Delta 45.4}$ ,  $TAZ^{\Delta 45.5}$ ,  $TAZ^{\Delta 45.6}$ ,  
127 were combined at a 1:1:1 ratio to create the cellular model  $TAZ^{\Delta 45}$ .

### 128 **Differentially abundant proteins in $TAZ^{\Delta 45}$ cells reveal downstream cellular dysfunction** 129 **due to TAZ deficiency**

130 Shotgun proteomics analysis identified a total of 7713 proteins in HEK293 WT and  $TAZ^{\Delta 45}$  cells.  
131 To focus our downstream workflow on proteins with differential abundance between the WT and  
132  $TAZ^{\Delta 45}$  cells, we selected proteins with a protein abundance fold change (FC,  $TAZ^{\Delta 45}/WT$ ) less  
133 than or equal to 0.80 ( $FC \leq 0.80$ ) and proteins with a FC greater than or equal to 1.2 ( $FC \geq 1.20$ )  
134 (Fig. 1E). Based on these criteria, there were a total of 836 differentially abundant proteins, 215  
135 with a  $FC \leq 0.80$  and 621 with a  $FC \geq 1.20$  (Fig. 1E). Functional annotation of the differentially  
136 abundant proteins, with KEGG pathway and gene ontology (GO) term enrichment analysis,  
137 identified multiple pathways of interest in  $TAZ^{\Delta 45}$  cells (Table S2A-B) (18, 19).

138 We identified 86 significantly enriched ( $p \leq 0.05$ ) KEGG pathways and GO terms for  
139 proteins with a  $FC \leq 0.80$ , such as: oxidative phosphorylation ( $p=2.7 \times 10^{-6}$ ), mitochondrial  
140 respiratory chain complex I assembly ( $p=7.9 \times 10^{-5}$ ), mitochondrial chain complex I ( $p=2.1 \times 10^{-4}$ ),  
141 response to oxidative stress ( $p=1.6 \times 10^{-3}$ ), NADH dehydrogenase (ubiquinone) activity  
142 ( $p=2.1 \times 10^{-3}$ ), and metabolic pathways ( $p=0.019$ ) (Table S2A). We identified 127 significantly  
143 enriched ( $p \leq 0.05$ ) KEGG pathways and GO terms for proteins with a  $FC \geq 1.20$ , such as:  
144 mitochondrion ( $p=2.2 \times 10^{-4}$ ), metabolic pathways ( $p=3.1 \times 10^{-3}$ ), positive regulation of apoptotic  
145 process ( $p=4.2 \times 10^{-3}$ ), AMPK signaling pathway ( $p=7.5 \times 10^{-3}$ ), response to oxidative stress  
146 ( $p=9.3 \times 10^{-3}$ ) (Table S2B).

### 147 **Functional annotation analysis: proteins of respiratory complex I and mitochondrial** 148 **quality control**

149 Defects in OXPHOS function have been previously described in BTHS, and consistent  
150 with these previous studies, we found that of the 86 terms significantly enriched for proteins with  
151  $FC \leq 0.80$  in  $TAZ^{\Delta 45}$  cells, 18 reference the mitochondrion and/or OXPHOS, including the  
152 OXPHOS KEGG pathway (Table S2A). Specifically, 11 proteins with a  $FC \leq 0.80$  are encoded  
153 by genes associated with the OXPHOS KEGG pathway (Fig. S3). Of these 11 proteins, 5 are  
154 subunits of complex I (CI) and the remaining 6 proteins are subunits of complex III, IV, and V

155 (Fig. S3). When we further examined the 18 terms that reference the mitochondrion and/or  
156 OXPHOS, we found that 4 specifically reference CI of OXPHOS (Table S2A).

157 The enrichment of the CI-associated terms in our functional annotation analysis was  
158 driven by 7 proteins encoded by the genes: *MT-ND3*, *NDUFAF1*, *NDUFA5*, *NDUFAB1*,  
159 *NDUFB2*, *NDUFB4*, and *OXA1L* (Fig. 2A). Five are subunits of CI (*MT-ND3*, *NDUFA5*,  
160 *NDUFAB1*, *NDUFB2*, *NDUFB4*), one is a CI assembly factor (*NDUFAF1*), and one assists with  
161 inserting proteins into the mitochondrial membrane and has been implicated in CI biogenesis  
162 (*OXA1L*) (20, 21). In total, proteomics identified and quantified 56 CI associated proteins in WT  
163 and *TAZ*<sup>Δ45</sup> cells, and 45/56 had reduced abundance in *TAZ*<sup>Δ45</sup> cells (FC range=0.608-0.998)  
164 (Table S3). Together, the functional annotation analysis highlights a decreased abundance of  
165 proteins associated with complex I, further delineating a previously described pathway in BTHS.

166 When we analyzed the top five proteins with significantly increased abundance, we  
167 identified PARL as a candidate for further study due to its role in regulating mitochondrial  
168 responses to stress, such as membrane depolarization and increased reactive oxygen species  
169 (22–24). Additionally, dysregulation of PARL substrates has been implicated in cardiomyopathy  
170 and cardiac development, further highlighting the potential role of PARL dysregulation in BTHS  
171 (25–27). Upon further investigation of the 127 terms significantly enriched for proteins with a FC  
172 > 1.20, we observed that 20 terms reference the mitochondrion or mitochondrial dynamics,  
173 including: metabolic pathways ( $p=3.1 \times 10^{-3}$ ), positive regulation of the apoptotic process ( $p=4.2$   
174  $\times 10^{-3}$ ), and mitochondrial inner membrane ( $p=5.2 \times 10^{-3}$ ) (Table S2B). The functional annotation  
175 analysis revealed other genes of interest due to their potential roles in apoptosis, lipid trafficking,  
176 and/or mitochondrial quality control (MQC), such as; *PRELID1*, *PRELID3B*, *CASP2*, *CASP7*,  
177 *CASP8*, and *CASP9* (28–30). Together with the proteomics findings, the functional annotation  
178 analysis suggests an increased abundance of proteins involved in MQC, a pathway not  
179 previously described in BTHS.

### 180 **Reduced complex I holoenzyme and activity in HEK293 *TAZ*<sup>Δ45</sup> cells and BTHS patient** 181 **derived lymphoblastoid cells**

182 To assess the biological significance of reduced CI associated proteins identified via  
183 proteomics, we further investigated CI subunit/holoenzyme mRNA expression, protein  
184 abundance, and function. We measured the relative mRNA expression of *NDUFAF1*, the most  
185 significantly reduced protein identified by proteomics (FC=0.797,  $p=0.004$ ), in both HEK293 and  
186 BTHS patient derived lymphoblastoid cells (LCLs). In *TAZ*<sup>Δ45</sup> cells, *NDUFAF1* had reduced  
187 mRNA expression ( $0.80$ ,  $p=6.4 \times 10^{-4}$ ), whereas in BTHS LCLs there was no significant  
188 difference in mRNA expression (Fig. 2B).



189 We also measured the relative mRNA expression the 5 other CI associated proteins that  
190 had a  $FC \leq 0.80$  (MT-ND3, NDUFA5, NDUFB2, NDUFAB1, and NDUFB4), as well as 3  
191 additional CI associated proteins (NDUFA9, NDUFS3, and NDUFB6), which did not have a  $FC$   
192  $\leq 0.80$  but had been previously shown to have reduced protein abundance in BTHS LCLs (Fig.  
193 2A & Fig. S4) (17). Of these 8 genes, 4 had significantly reduced mRNA expression in  $TAZ^{\Delta 45}$   
194 cells (*NDUFB2*  $p=0.04$ , *NDUFAB1*  $p=0.001$ , *NDUFB4*  $p=0.02$ , and *NDUFB6*  $p=0.01$ ) (Fig. S4).  
195 *NDUFA5*, *NDUFA9*, and *NDUFS3* had reduced mRNA expression in  $TAZ^{\Delta 45}$  cells but this  
196 reduction did not reach statistical significance (Fig. S4). There were no significant differences in  
197 the mRNA expression between control and BTHS LCLs, however there was significant  
198 variability in mRNA expression of all genes between the 5 individual BTHS LCL lines (Fig. S5).  
199 These individual differences could be due to the individual patient's genetic background or the  
200 EBV transformation of the LCLs and may obfuscate the biological significance of mRNA  
201 expression in patient-derived LCLs.

202 Immunoblotting of HEK293 and LCL whole cell lysate for NDUFAF1 confirmed reduced  
203 protein abundance in  $TAZ^{\Delta 45}$  cells ( $FC=0.69$ ,  $p=4.89 \times 10^{-10}$ ) and BTHS LCLs ( $FC=0.75$ ,  $p=7.69$   
204  $\times 10^{-7}$ ) (Fig. 2C). We also immunoblotted HEK293 and LCL mitochondria for the 3 additional CI  
205 subunits that had been previously shown to have reduced protein abundance (17). There was a  
206 subtle trend towards reduced NDUFA9, NDUFS3, and NDUFB6 abundance in  $TAZ^{\Delta 45}$  cells  
207 ( $p=ns$ ,  $p=0.04$ ,  $p=0.05$ , respectively), and a strong reduction in BTHS LCLs ( $p=7.6 \times 10^{-6}$ ,  $p=1.8$   
208  $\times 10^{-7}$ ,  $p=5.1 \times 10^{-6}$ , respectively) (Fig. S6). The abundance of NDUFA9, NDUFS3, and NDUFB6  
209 in  $TAZ^{\Delta 45}$  cells aligns with our proteomics findings, that found no significant difference in the  
210 abundance of these proteins between WT and  $TAZ^{\Delta 45}$  cells (Fig. 2A, Fig. S6). In order to  
211 determine whether TAZ deficiency affected the protein abundance of subunits from other  
212 respiratory complexes, we also immunoblotted for UQCRC2, a subunit of respiratory complex  
213 III. We found no significant difference in UQCRC2 abundance between WT and  $TAZ^{\Delta 45}$  cells,  
214 and a subtle but significantly reduced abundance of UQCRC2 in BTHS LCLs compared to  
215 controls (Fig. S6).

216 To determine the total abundance of CI holoenzyme, HEK293 and LCL cells were  
217 solubilized with Triton X-100 and resolved by BN-PAGE for the quantification of individual  
218 respiratory complexes. CI was the most significantly reduced complex, and the ratio of CI to CIV  
219 (CI:CIV) or CI:CII was significantly reduced in both  $TAZ^{\Delta 45}$  vs. WT ( $p=2.32 \times 10^{-5}$ ,  $p=1.62 \times 10^{-4}$ ,  
220 respectively) and BTHS LCLs vs. controls ( $p=0.001$ ,  $p=0.005$ , respectively) (Fig. 2D). By  
221 comparing starting material and the cellular pellet following solubilization via immunoblotting, we

222 found no significant difference in the solubilization of  $TAZ^{\Delta 45}$  and WT cells (87% and 88%  
223 solubilization efficiency, respectively). There was a minimal though statistically significant  
224 difference in the solubilization of BTHS and control LCLs (84% and 79% solubilization  
225 efficiency, respectively,  $p=0.03$ ). Therefore, the observed differences were not due to an effect  
226 of altered CL on Triton X-100 solubilization.

227 Using a colorimetric CI enzyme activity assay that detects the oxidation of NADH to  
228  $NAD^+$ , we found a significant reduction in CI activity in both  $TAZ^{\Delta 45}$  cells and BTHS LCLs ( $p=9.4$   
229  $\times 10^{-5}$  &  $p=1.8 \times 10^{-4}$ , respectively) (Fig. 2E). Using a colorimetric CII enzyme activity assay, we  
230 found no significant difference in CII activity between WT and  $TAZ^{\Delta 45}$  cells or between control  
231 and BTHS LCLs, emphasizing the preeminent role of CI in BTHS-associated OXPHOS  
232 dysfunction (Fig. 2F). There was a wide range of CII function in LCLs derived from different  
233 individuals (Fig. S7). Overexpression of *NDUFAF1*, a CI assembly factor and the most  
234 significantly reduced CI associated protein in  $TAZ^{\Delta 45}$  cells, did not normalize the CI functional  
235 deficiency in  $TAZ^{\Delta 45}$  cells, indicating that CI dysfunction is due to a combination of reduced  
236 subunits and assembly factors (Fig. S8).

237 Measurement of intracellular NADH and  $NAD^+$  showed a trend towards an increase in  
238 the ratio of NADH to  $NAD^+$  in both  $TAZ^{\Delta 45}$  and BTHS LCLs compared to either WT or controls,  
239 though neither reached statistical significance (Fig. 2G). There was also an increase in  
240 intracellular AMP in both  $TAZ^{\Delta 45}$  cells and BTHS LCLs compared to either WT or controls, with a  
241 significant increase in the BTHS LCLs ( $p=0.002$ ) (Fig. 2H). This moderate disturbance in energy  
242 homeostasis is consistent with the modest perturbations we observed in CI from mRNA  
243 expression, to protein expression, and ultimately activity in TAZ-deficient cells.

#### 244 **Increased PARL abundance correlates with increased cleavage of downstream target** 245 **PGAM5**

246 To confirm the proteomics finding of increased PARL abundance (FC=1.815,  $p=0.016$ ) in TAZ-  
247 deficient HEK293 cells, we immunoblotted HEK293 and LCL whole cell lysate for PARL. Using  
248 a PARL-KO HEK293 cell line generously provided by the Langer Laboratory, we identified a  
249 single band at ~33kD present in both WT and  $TAZ^{\Delta 45}$  cells and absent in the PARL-KO cells,  
250 consistent with the band representing mature mitochondrial PARL (MAMP-PARL), referred to as  
251 PARL (Fig. S9) (24).

252 In  $TAZ^{\Delta 45}$  cells there was a significant increase in the abundance of PARL (FC=1.51,  
253  $p=1.81 \times 10^{-10}$ ) (Fig. 3A). There was a subtle but significant increase in the relative mRNA  
254 expression of *PARL* in  $TAZ^{\Delta 45}$  cells (WT=0.97,  $TAZ^{\Delta 45}$ =1.09,  $p=0.02$ ) (Fig. 3B). Immunoblotting



255 of LCL whole cell lysate for PARL showed a significant reduction in PARL abundance, however,  
256 there was extreme variability in PARL abundance in the CTRL lines (CTRL 1-3 vs CTRL 4-5)  
257 (Fig. S10A). There was no significant difference in the mRNA expression of PARL between  
258 CTRL and BTHS LCLs or across the 5 different BTHS LCL lines (Fig. S10B-C). Thus, increased  
259 PARL in TAZ-deficient HEK293 cells may be regulated both at the transcriptional and protein  
260 expression levels, and lack of consistent findings in BTHS LCLs may be due to cell-type specific  
261 differences in PARL regulation or difficulty with detection in a small sample size due to high  
262 intra-subject variability.

263 To investigate the biological significance of increased PARL abundance in  $TAZ^{\Delta 45}$  cells,  
264 we assessed a downstream proteolytic target of PARL, PGAM5. Previous evidence suggests  
265 that PGAM5 is cleaved by PARL and another stress-activated IMM protease, OMA1, in  
266 response to loss of mitochondrial membrane potential ( $\Delta\Psi_m$ ) (31). At baseline, we observed a  
267 significant increase in the percent of cleaved PGAM5 in  $TAZ^{\Delta 45}$  cells ( $p=1.5 \times 10^{-7}$ ) (Fig. 3C).  
268 There was no significant difference in the percent of cleaved PGAM5 between CTRL and BTHS  
269 LCLs (Fig. S10D)

270 Upon treatment with membrane depolarizer carbonyl cyanide m-chlorophenyl hydrazine  
271 (CCCP), with serial time point measurements, we observed that  $TAZ^{\Delta 45}$  cells maintained a  
272 significantly greater abundance of PARL until the final timepoint of 120 mins (Fig. 3E, Table S5).  
273 This increase in PARL abundance with CCCP correlates with the increase in PGAM5 cleavage  
274 observed in both WT and  $TAZ^{\Delta 45}$  cells (Fig. 3D). Under the same CCCP treatment protocol, we  
275 also observed an increase in the percentage of cleaved PGAM5 in WT cells and  $TAZ^{\Delta 45}$  cells,  
276 where  $TAZ^{\Delta 45}$  cells maintained a significantly greater percentage of cleaved PGAM5 at all time  
277 points tested (Fig. 3D). The difference in the percentage of cleaved PGAM5 between WT and  
278  $TAZ^{\Delta 45}$  cells increased over time, from a 11% difference at 0 mins to a 18% difference at 120  
279 mins (Fig. 3D, Table S4).

280 We further demonstrated that PGAM5 cleavage was absent and reduced in PARL-KO  
281 cells not treated or treated with CCCP, respectively, underscoring that PGAM5 is predominantly  
282 cleaved by PARL (Fig. 3F). In summary, we observed baseline abnormalities in PARL  
283 abundance and PGAM5 cleavage, which is exacerbated upon mitochondrial depolarization, in  
284 TAZ-knockout HEK293 cells.

285 **Targeting CL with bromoenol lactone and SS-31 normalizes downstream cellular**  
286 **dysfunction**

287 To determine if targeting CL and CL metabolism would affect the dysregulation observed  
288 in respiratory CI and/or MQC, *TAZ*<sup>Δ45</sup> and WT cells were treated with either bromoenol lactone  
289 (BEL) or SS-31. Previous studies have shown that treatment with BEL, an inhibitor of calcium-  
290 independent PLA<sub>2</sub> (iPLA<sub>2</sub>), partially remediates CL abnormalities by reducing MLCL  
291 accumulation and CL depletion (32, 33). SS-31, a cell permeable mitochondria-targeted  
292 tetrapeptide, selectively binds CL where it has been shown to stabilize cristae morphology and  
293 preserve mitochondrial bioenergetics (34, 35).

294 The relative abundance of *NDUFAF1* in *TAZ*<sup>Δ45</sup> cells increased following BEL treatment  
295 and significantly increased following SS-31 treatment ( $p = 2.8 \times 10^{-5}$ ) (Fig. 4A, Table S6).  
296 *NDUFAF1* relative mRNA expression significantly increased in *TAZ*<sup>Δ45</sup> cells following both BEL  
297 and SS-31 treatment ( $p = 0.05$  and  $p = 0.01$ , respectively) (Fig. 4B, Table S7). The relative  
298 mRNA expression was also measured for the other 4 CI associated genes that had significantly  
299 reduced levels in *TAZ*<sup>Δ45</sup> cells at baseline (*NDUFB2*, *NDUFAB1*, *NDUFB4*, and *NDUFB6*).  
300 Following BEL treatment, these significant differences in expression between *TAZ*<sup>Δ45</sup> vs. WT  
301 were no longer observed in any of the 4 genes tested, and following SS-31 treatment, the  
302 significant differences were no longer observed in 3 of the 4 genes tested (Fig. S12, Table S7).

303 Next, CI holoenzyme abundance was measured in BEL and SS-31 treated cells by BN-  
304 PAGE. CI remained the most significantly reduced complex in *TAZ*<sup>Δ45</sup> cells after BEL or SS-31  
305 treatment (Fig. 4C). However, both treatments had a subtle effect on the ratio of both CI to CIV  
306 (CI:CIV) and CI to CII (CI:CII) (Fig. 4C, Table S8). The CI:CIV relative abundance increased  
307 from 0.59 in untreated *TAZ*<sup>Δ45</sup> cells to 0.77 in *TAZ*<sup>Δ45</sup>-BEL cells and 0.80 in *TAZ*<sup>Δ45</sup>-SS-31 cells  
308 (Fig. 4C, Table S8). The CI:CII relative abundance significantly increased from 0.66 in untreated  
309 *TAZ*<sup>Δ45</sup> cells to 0.89 in *TAZ*<sup>Δ45</sup>-BEL cells ( $p = 6.1 \times 10^{-3}$ ) and to 0.83 in *TAZ*<sup>Δ45</sup>-SS-31 cells (Fig.  
310 4C, Table S8). Overall, treatment with either BEL or SS-31 showed a subtle increase in CI  
311 holoenzyme abundance.

312 Immunoblotting of BEL and SS-31 treated HEK293 whole cell lysate for PGAM5 showed  
313 a significant decrease in the percentage of cleaved PGAM5 in *TAZ*<sup>Δ45</sup>-BEL (18%,  $p = 0.01$ ) and  
314 *TAZ*<sup>Δ45</sup>-SS-31 (13%,  $p = 2.6 \times 10^{-4}$ ) cells compared to *TAZ*<sup>Δ45</sup>-untreated cells (23%) (Fig. 4D,  
315 Table S9). There was no significant difference in the percentage of cleaved PGAM5 in *TAZ*<sup>Δ45</sup>-  
316 BEL versus WT-BEL cells or *TAZ*<sup>Δ45</sup>-SS-31 versus WT-SS-31 cells (Fig. 4D, Table S9). Further,  
317 immunoblotting of BEL and SS-31 treated HEK293 whole cell lysate for PARL showed a  
318 significant decrease in the relative abundance of PARL in *TAZ*<sup>Δ45</sup>-BEL (FC= 0.93,  $p = 7.1 \times 10^{-15}$ )  
319 and *TAZ*<sup>Δ45</sup>-SS-31 (FC= 1.11,  $p = 9.9 \times 10^{-5}$ ) cells compared to *TAZ*<sup>Δ45</sup>-untreated cells (FC= 1.53)

320 (Fig. 4E, Table S10), which was essentially restored to WT levels. Collectively, these results  
321 indicate that drugs that target CL partially rescue the defects in CI and MQC observed in TAZ-  
322 deficient cells.

323

## 324 **Discussion**

325 As a central phospholipid of the IMM, CL has been shown to have diverse roles in mitochondrial  
326 function (1). Yet, these diverse roles are currently underappreciated in the pathophysiology of  
327 Barth syndrome, which is the only known Mendelian disorder of CL metabolism. In this study,  
328 we took an untargeted approach to identify dysregulated proteins in TAZ-deficient HEK293 cells  
329 and pursued two areas of dysregulation for further study: CI of the respiratory chain and  
330 components of mitochondrial quality control.

331 Previous work has linked TAZ deficiency and mitochondrial respiratory chain  
332 dysfunction, with several studies pointing towards CI as the most impacted respiratory chain  
333 complex (15, 17, 36). In this work we confirmed that CI expression and function are abnormal in  
334 TAZ deficiency. We further showed that this dysfunction is potentially driven by the decreased  
335 expression of 5 subunits of mitochondrial CI, *MT-ND3*, *NDUFA5*, *NDUFAB1*, *NDUFB2*,  
336 *NDUFB4*, and reduced expression of the mitochondrial assembly factor, *NDUFAF1*. These  
337 specific deficiencies could disrupt aspects of the coordinated modular assembly of CI and  
338 further studies into CI modular assembly in BTHS could prove to be revealing (20, 37).

339 We further identified abnormal expression and regulation of MQC associated proteins  
340 including PARL and PGAM5. MQC, involving the processes of mitochondrial proteostasis,  
341 biogenesis, dynamics, and mitophagy, is emerging as a central theme for the pathogenesis of  
342 various diseases (38–40). PARL participates in MQC via reciprocal proteolysis of PGAM5 and  
343 PINK1 (22, 31). Upon mitochondrial depolarization, PARL upregulation accelerates PGAM5  
344 proteolysis which drives mitochondrial fragmentation (31). Defective mitochondrial quality  
345 control, particularly as it affects cellular energy production and stress responsiveness, is  
346 increasingly recognized for its role in diverse forms of cardiac dysfunction and may be central to  
347 the cardiac pathogenesis of BTHS (41).

348 In order to determine if the abnormalities we identified are directly associated with  
349 abnormal CL, we tested the ability of a pharmacological inhibitor of PLA2 $\gamma$  (BEL), a protein  
350 capable of generating MLCL from CL, and a CL binding peptide (SS-31) to ameliorate the two  
351 TAZ-deficient phenotypes we established. Indeed, we showed that targeting CL and CL  
352 metabolism with BEL and SS-31 is sufficient to modulate CI subunit gene expression and

353 protein abundance, PARL abundance, and PGAM5 cleavage. Thus, targeting multiple aspects  
354 of CL metabolism may be a feasible therapeutic approach in BTHS.

355 In terms of future directions for study, it is notable that among the CI subunits that we  
356 identified as having altered expression in TAZ deficiency, NDUFAB1 has an essential role in  
357 fatty acid biosynthesis due to its dual role as the mitochondrial acyl carrier protein (mt-ACP)  
358 (42). In fact, the GO term “protein lipoylation” was identified in the functional annotation of  
359 proteins with a FC  $\leq$  0.80 (Table S2A). In this role, abnormal expression of NDUFAB1/mt-ACP  
360 in TAZ deficiency may have further implications beyond affecting CI assembly and function,  
361 including affecting CL acyl chain content. Additionally, mt-ACP is involved in the assembly of the  
362 mitochondrial ribosome, and therefore mt-ACP expression and abundance may further influence  
363 changes in mitochondrial gene expression (43). Further examining the essential role of  
364 NDUFAB1, outside of CI assembly and function, may provide a mechanistic link between  
365 altered CL metabolism and altered bioenergetic metabolism. Defects in MQC pathways, have  
366 been implicated in the pathogenesis of various cardiac pathologies relevant to BTHS.  
367 Additionally, enlarged mitochondria have been observed in BTHS patient and mouse model  
368 derived cardiac tissue, consistent with impaired mitophagy (44–47). Thus, further examining  
369 these pathways in an appropriate cellular context could provide insight into potential therapeutic  
370 targets for BTHS and other conditions resulting from MQC dysfunction.

371 Finally, it is important to note that some of our findings were cell-type specific (HEK293  
372 vs. LCL). We found that HEK293s and LCLs differed in PARL abundance, which is consistent  
373 with previous studies confirming cell-type specific expression and regulation of PARL, and  
374 introduces further questions about whether cell-type specific mechanisms of MQC contribute to  
375 the tissue distribution of disease in BTHS (48). We also identified a reduction in CI subunit  
376 protein abundance, holoenzyme abundance, and CI activity in both HEK293 TAZ-KO cells and  
377 BTHS LCLs; however, in BTHS LCLs reduced mRNA expression of CI subunits was not  
378 observed. The differences in mRNA expression observed between the HEK293s and the LCLs  
379 could be due to epigenetic and transcriptomic differences observed in EBV transformed LCL  
380 lines, the genetic differences between the BTHS individuals, and/or cell type specific regulation  
381 of CI associated genes/proteins (49). This hypothesis emphasizes the need for a clearer  
382 understanding of the cell-specific effects of abnormal CL content. To explore these questions,  
383 we are presently exploring respiratory chain and MQC dysfunction in diverse TAZ-KO cell types  
384 in order to understand how these pathways are associated with the tissue specific expression of  
385 BTHS.

386

387 **Materials and Methods**

388 **Cell lines and culture conditions.**

389 HEK293 WT cells were purchased from ATCC (293 [HEK-293]x ATCC® CRL-1573™).  
390 Collection of control (LCL Control #1) and BTHS patient (LCL BTHS #1-5) derived LCL lines  
391 had institutional IRB approval via Johns Hopkins University protocols #IRB00098987 (Table  
392 S11). Individuals were diagnosed with BTHS via an increased MLCL:CL ratio. Additional control  
393 LCL lines (n=9) were acquired through the following sources: Biochemical Genetics Laboratory  
394 at Kennedy Krieger Institute (LCL Control #2-3), Valle Laboratory (LCL Control #4-5), Coriell  
395 NINDS Biobank (LCL Control #6-9) (Table S11).

396 LCL lines were transformed by the Biochemical Genetics Laboratory at Kennedy Krieger  
397 Institute and the Valle Laboratory used the following protocol. Peripheral blood samples were  
398 centrifuged for 15 minutes at 3000 rpm. The “buffy coat” was then resuspended in RPMI and  
399 further centrifuged for 10 minutes at 1000 rpm. The resulting cell pellet was resuspended in  
400 RPMI and incubated with Epstein-Barr (EB) virus and T-cell growth factor (TCGF) at 37C for 48-  
401 72 hours. After incubation period, additional RPMI was added to the flask. Cells were monitored  
402 and fed RPMI for two weeks, after which the established transformed cell lines were passaged  
403 for experiments and/or freezing. LCL lines acquired through the Coriell NINDS Biobank were  
404 also transformed via EB virus.

405 All cells were grown at 37°C, 5% CO<sub>2</sub>. HEK293 WT and TAZ<sup>Δ45</sup> were maintained in  
406 DMEM with L-glutamine and 4.5 g/L Glucose (Corning Cellgro Cat. #10-017) containing 10%  
407 fetal bovine serum (FBS, Gemini) and 2 mM L-glutamine (Gibco, Cat. #25030149). Patient  
408 derived lymphoblastoid cells (LCLs) were maintained in RPMI 1640 (Gibco, Cat. # 11875119)  
409 containing 10% FBS (Gemini). Mycoplasma contamination was routinely monitored and not  
410 detected.

411 For CCCP treatment, HEK293s were seeded into 6-well plates. At confluence, cells were  
412 either treated with 20uM CCCP (Cat. No) for 0,10,30,60,90, and 120 mins, or  
413 0,10,20,40,80,100uM CCCP for 45 mins.

414 For BEL treatment, HEK293s (400K) were seeded into 6-well plates. 48hrs later, at 80-  
415 90% confluence, cells were treated with 2.5uM BEL (Cat. No) for 48hrs.

416 For SS-31 treatment, HEK293s (50K) were seeded into 6-well plates. For 7 days, cells  
417 were fed fresh 100nM SS-31.

418 **CRISPR/Cas9 genome editing**

419 sgRNAs (Figure S1 & Table SI) targeting exon 2 of *TAZ* were designed at [www.crispr.mit.edu](http://www.crispr.mit.edu)  
420 and selected based on the scoring algorithm detail in Hsu et al. 2013 (Table S1) (50, 51).

421 Synthesized sgRNA 1 and sgRNA 2 were individually cloned into pSpCas9(BB)-2A-Puro  
422 (PX459) V2.0 vector pSpCas9(BB)-2A-Puro (PX459) V2.0 was a gift from Feng Zhang  
423 (Addgene plasmid # 62988 ; <http://n2t.net/addgene:62988> ; RRID:Addgene\_62988 (50).  
424 HEK293 WT cells were transfected with both sgRNA vectors using Lipofectamine 2000  
425 (Invitrogen). 24-hours after transfection cells were subjected to Puromycin selection (2ug/mL)  
426 for approximately 48 hours. Following selection, cells we passaged in order to isolate single cell  
427 clones. Confluent colonies of single cell clones were collected using a cloning cylinder and  
428 expanded for DNA isolation and screening.

#### 429 **Screening and genotyping**

430 Genomic DNA was extracted from an aliquot of  $3 \times 10^6$  cells using the Gentra Puregene Kit  
431 (Qiagen). The genomic region surrounding the CRISPR/Cas9 target site (741 bp) was PCR  
432 amplified using AccuPrime GC-Rich DNA Polymerase (Invitrogen) (Table S1). The PCR product  
433 was then used for screening with Surveyor Assay Kit (IDT). The PCR product of Surveyor-  
434 Positive clones was further analyzed by Sanger sequencing.

#### 435 **RT-PCR**

436 RNA was extracted from an aliquot of  $3 \times 10^6$  cells using the RNeasy Plus Kit (Qiagen). cDNA  
437 was synthesized from extracted RNA using the iScript cDNA Synthesis Kit (BioRad). The region  
438 surrounding the CRISPR/Cas9 target site was PCR amplified using AccuPrime GC-Rich DNA  
439 Polymerase (Invitrogen) (Forward Primer: 5' TACATGAACCACCTGACCGT 3', Reverse Primer:  
440 5' CAGATGTGGCGGAGTTTCAG 3'). PCR products were resolved on a 0.8% agarose gel.

#### 441 **Whole Cell Lysate Extraction**

442 An aliquot of  $3 \times 10^6$  cells was centrifuged for 4 minutes at 1000rpm. The resultant cell pellet  
443 washed twice with ice-cold PBS and lysed with RIPA lysis buffer (1% (v/v) Triton X-100, 20 mM  
444 HEPES-KOH, pH 7.4, 50 mM NaCl, 1 mM EDTA, 2.5 mM MgCl<sub>2</sub>, 0.1% (w/v) SDS) spiked with  
445 1 mM PMSF for 30 min at 4°C with rotation. Insoluble material was removed by centrifugation  
446 for 30 min at 21000g at 4°C, the supernatant collected, and protein quantified using a  
447 bichichronic acid (BCA) assay (Pierce).

#### 448 **Mitochondrial Isolation**

449 Mitochondrial isolation of HEK293s was performed as previously described by Lu et al.(3).  
450 Mitochondrial isolation of LCLs was also performed as previously described, with slight  
451 modification. LCLs were grown in maintenance media until total cell count exceeded  $100 \times 10^6$   
452 cells. LCLs were then centrifuged for 4 minutes at 1000rpm before beginning the previously  
453 described protocol by Lu et al.(3).

#### 454 **Immunoblotting**



455 Whole cell extracts or mitochondria, resuspended in XT Sample Buffer (BioRad) and Reducing  
456 Agent (BioRad), were resolved on Criterion XT 12% Bis-Tris gels (BioRad) in XT MOPS  
457 Running buffer (BioRad). Proteins were transferred to Immuno-Blot PVDF (BioRad) at 100V for  
458 1 hour. Following transfer, membranes were blocked with 5% milk, 0.05% Tween-20 in PBS  
459 (Blocking Buffer) for 1 hour at room temperature or at 4C if longer, with rocking. Following  
460 blocking, membranes were briefly washed with PBST (PBS with 0.2% Tween-20) and then  
461 incubated with primary antibody in PBST with 0.02% Na-Azide overnight at 4C with rocking.  
462 Following three successive 10-minute washes with PBST at room temperature, HRP-conjugated  
463 secondary antibodies were added and incubated for 45 min at room temperature. The  
464 membranes were then washed three times for 10 minutes with PBST and twice for 10 minutes  
465 with PBS. Immunoreactive bands were visualized using ECL Western Blotting Detection  
466 (Amersham) or SuperSignal West Pico PLUS (Pierce). Images were captured with a Fluorchem  
467 Q (Cell Biosciences, Inc.) or on film. Film was scanned before quantification. Quantitation of  
468 bands was performed using ImageJ and protein expression values were normalized to loading  
469 controls.

#### 470 **Antibodies**

471 Antibodies against the following proteins were used;  $\beta$ -actin (loading control, Life Technologies  
472 #AM4302), GRP75 (loading control, 75-127), TAZ (#2C2C9)(3), NDUFAF1 (Abcam, #ab79826),  
473 PARL (Abcam #ab45231, Proteintech #26679-1-AP, Langer Laboratory), UQCRC2 (Abcam,  
474 #ab14745), NDUFA9 (Abcam, #ab14713), NDUFS3 (Abcam, #ab110246), NDUFB6 (Abcam,  
475 #ab110244). Two HRP-conjugated secondary antibodies were used; goat anti-rabbit (Abcam,  
476 #ab6721), goat anti-mouse (Abcam, #ab205719).

#### 477 **Lipidomics**

478 Lipids were extracted from cell pellets ( $3 \times 10^6$  cells) and analyzed as previously described by  
479 Vaz et al. (52).

#### 480 **Proteomics**

481 Samples (HEK293 WT n=3, and TAZ<sup>Δ45</sup> n=3, serial passages) were reduced in 5 mM DTT for 1  
482 hour at 56C, alkylated in 10 mM iodoacetamide for 30 minutes in the dark at room temperature,  
483 and precipitated in cold (-20C) acetone 10% trichloroacetic acid. The precipitate was pelleted by  
484 centrifugation at 16,000 g for 15 minutes, the supernatant was discarded, and the pellet was  
485 rinsed with cold acetone and dried at room temperature. The samples were reconstituted in 50  
486  $\mu$ L of 20% acetonitrile 80 mM triethyl ammonium bicarbonate (TEAB) and digested with 3.3  $\mu$ g  
487 of trypsin/Lys-C mix (Promega) at 37C overnight. The digested samples were labeled with TMT  
488 10-plex reagent (Thermo, Lot #SK257889) and combined. The sample was lyophilized and

489 reconstituted in 0.5 mL of 10 mM TEAB and fractionated by high (8-9) pH reversed phase  
490 chromatography into 84 fractions which were concatenated into 24. Each of the 24 fractions was  
491 lyophilized and reconstituted in 2% acetonitrile 0.1% formic acid and separated over a 90-  
492 minute low (2-3) pH reversed phase gradient (120 minutes run time) for mass spectrometry  
493 (MS) analysis on an Orbitrap Fusion.

494 MS data were acquired using serial data-dependent fragmentation of individual  
495 precursor ions (DDA). An intact precursor ion scan (MS1) spanning 400 - 1600 Th was acquired  
496 every 3 seconds at a resolution of 120,000 (at  $m/z = 200$ ). Fragmentation scans (MS2) were  
497 acquired at 60,000 resolution between precursor scans by isolation of individual precursor ions  
498 at 0.6 Th resolution, accumulation to  $5 \times 10^4$  automatic gain control for a maximum injection time  
499 of 250 ms, and activation with beam collision (HCD) at 38% energy. Mass accuracy was  
500 maintained throughout the experiment by internal calibrant lock mass.

501 The acquired data were searched against the SwissProt Human database by MASCOT  
502 using 4 ppm and 0.01 Da precursor and fragment maximum mass error, respectively. TMT  
503 labeled lysine and peptide N-termini and carbamidomethylation of cysteine were set as static  
504 modifications. Oxidation of methionine and deamidation of asparagine and glutamine were set  
505 as dynamic modifications. The results were rescored by Percolator in Proteome Discoverer 2.2  
506 and quantitative analysis was carried out based on reporter ion intensities.

### 507 **Function Annotation**

508 We selected proteins with a protein abundance fold change (FC,  $TAZ^{\Delta 45}/WT$ ) less than or equal  
509 to 0.80 ( $FC \leq 0.80$ ) and proteins with a FC greater than or equal to 1.2 ( $FC \geq 1.20$ ). Each subset  
510 was individually uploaded to DAVID 6.8 and compared to the background "Homo sapiens" (18,  
511 19). With the functional annotation tool, we pulled all KEGG pathways and GO terms for further  
512 analysis.

### 513 **Quantitative RT-PCR**

514 Total RNA was extracted from an aliquot of  $3 \times 10^6$  cells using the RNeasy Plus Kit (Qiagen).  
515 cDNA was synthesized from extracted RNA using the iScript cDNA Synthesis Kit (BioRad) in 20  
516  $\mu$ l reactions according to the manufacturer's suggested protocol using 1  $\mu$ g of RNA. cDNA was  
517 subsequently diluted 10-fold with water. 2.4  $\mu$ l of cDNA was analyzed in 12  $\mu$ l reactions using  
518 the SsoAdvanced Universal SYBR Green Supermix (Bio-Rad) according to the manufacturer's  
519 instructions and included each respective forward and reverse gene-specific primers (Table  
520 S12). Each sample-primer reaction was plated in triplicate per plate. Each plate also included  
521 both no reverse-transcriptase controls (No-RT) for each cDNA sample and no template controls  
522 (No-Template) for each primer pair. The reaction conditions were as follows: 2 min at 95°C,

523 followed by 40 two-temperature cycles of 5 s at 95°C and 30 s at 60°C. For nuclear genes,  
524 expression of each gene was analyzed by the comparative CT ( $\Delta\Delta$ CT) method with *TBP* and  
525 *HPRT1* being averaged as endogenous reference genes. For mitochondrial genes (*MT-ND3*),  
526 expression of each gene was analyzed by the comparative CT ( $\Delta\Delta$ CT) method with *MT-RNR1*,  
527 *MT-CO1*, and *MT-ATP6* being averaged as endogenous reference genes. Values were  
528 represented as average fold change relative to respective wildtype or untreated controls.

#### 529 **1D BN-PAGE**

530 Cell pellets (100,000 cells, ~120ug) were solubilized for 30 min on ice in 20 mM Bis-Tris, 10%  
531 glycerol, 50 mM NaCl, supplemented with 1% (v/v) Triton X-100 and protease inhibitors (PMSF,  
532 Leupeptin, Pepstatin). Extracts were clarified by centrifugation for 30 min at 21 000g at 4C and  
533 analyzed by 1D BN/SDS-PAGE as described by Claypool et al. (53).

#### 534 **Complex I and II activity assays**

535 The activity of complex I was measured using the Complex I Enzyme Activity Microplate Assay  
536 Kit (Abcam, #ab109721) according to the manufacturer's instructions using 200ug of isolated  
537 mitochondria for both HEK293s and LCLs. The activity of complex II was measured using the  
538 Complex II Enzyme Activity Microplate Assay Kit (Abcam, #ab109908) according to the  
539 manufacturer's instructions using 200ug of isolated mitochondria for both HEK293s and LCLs.

#### 540 **NDUFAF1 Transfection**

541 HEK293 cells were seeded into 15 cm plates. When cells reached ~80% confluency cells were  
542 transiently transfected with *NDUFAF1*(NM\_016013) C-Myc/DDK-tagged plasmid (Origene  
543 #RC200029) with Lipofectamine 3000 (Thermo #L3000001) according to manufacturer's  
544 instructions. 75.4 ug of plasmid was transfected with 105 uL of Lipofectamine 3000 per 15 cm  
545 plate. The cells were grown in galactose media for 48hrs before mitochondria extraction  
546 performed as described previously.

#### 547 **Metabolomics**

548 HEK and LCL cell samples undergoing metabolic analysis were initially kept on ice and washed  
549 with ice-cold PBS prior to collection, followed by centrifugation at 1500RPM and 4°C.

550 Metabolites within the cell pellet were extracted with 80% HPLC-grade methanol (Fisher  
551 Scientific) and 20% mass-spec (MS)-grade water as previously described (54). The extraction  
552 solution was then collected and evaporated using a speed-vac and a lyophilizer which resulted  
553 in a white powder of dried metabolites. The collected metabolites were subsequently  
554 resuspended in 50% (vol/vol) acetonitrile diluted with MS-grade water and analyzed via an  
555 Agilent 1260 HPLC and 6490 triple-quadrupole (QQQ) mass spectrometer.

556           The Agilent 1260 HPLC-autosampler system was kept at 4°C for the entirety of the run  
557 to prevent any degradation within the samples. Optimal separation was achieved with a reverse  
558 phase chromatography system with an aqueous mobile phase of MS-grade water with 0.1%  
559 formic acid and an organic mobile phase of 98% acetonitrile with 0.1% formic acid. The  
560 Discovery® HS F5 HPLC Column (3µm particle size, L × I.D. 15 cm × 2.1 mm, Sigma) with a  
561 compatible guard column (Sigma) were used and maintained at a temperature of 35°C. The  
562 injection volume was 2µL and the runtime was 50 minutes per sample. The flow rate, buffer  
563 gradient, and mass spectrometer parameters for the method were the same as previously  
564 described (55).

565           Data from pure standards of each compound of interest were acquired prior and  
566 simultaneously with samples in identical setting: precursor and product ion transitions, collision  
567 energy, and ion polarity. Agilent MassHunter and Agilent Qualitative and Quantitative Analysis  
568 Software packages were used to analyze the metabolic profiles. The metabolite peaks were  
569 integrated for raw intensities and then normalized by protein concentration collected from the  
570 original cell pellet. Protein concentration was determined using a FilterMax F5 microplate reader  
571 and a Bovine Serum Albumin (BSA) standard.

#### 572 **Data Analysis**

573 All statistical analyses were performed using R version 3.3.2 (2016-10-31) (56). Between-group  
574 comparisons were performed using Welch's two-sample t-test. Outliers, outside 1.5x the  
575 interquartile range above the upper quartile and below the lower quartile were only removed for  
576 statistical analyses of the isogenic HEK293 cell lines.

577

578 **Acknowledgements**

579 We thank Ya-Wen Lu and Michelle Acoba of the Claypool Lab for their critical and fruitful  
580 technical guidance. We also want to thank Thomas Langer, and the Langer Laboratory for the  
581 generous gift of PARL antibody and PARL-KO HEK293 cells. Research reported in this  
582 publication was supported by the National Heart, Lung, And Blood Institute of the National  
583 Institutes of Health under Award Number F31HL147454 to A.F.A. The content is solely the  
584 responsibility of the authors and does not necessarily represent the official views of the National  
585 Institutes of Health. Proteomics analysis was supported by the Johns Hopkins University School  
586 of Medicine Core Coins Program to V.J.H.

587

588 **Conflict of Interest**

589 Hilary Vernon has received research support from Stealth BioTherapeutics.

590

591

592 **References**

- 593 1. A. F. Anzmann, S. M. Claypool, H. Vernon, "Mitochondrial Dysfunction and Barth  
594 Syndrome" in *Handbook of Mitochondrial Dysfunction*, S. I. Ahmad, Ed. (CRC  
595 Press/Taylor & Francis Group, 2019), pp. 61–77.
- 596 2. I. L. Gonzalez, Barth syndrome: TAZ gene mutations, mRNAs, and evolution. *Am. J.*  
597 *Med. Genet.* **134 A**, 409–414 (2005).
- 598 3. Y. W. Lu, *et al.*, Defining functional classes of Barth syndrome mutation in humans. *Hum.*  
599 *Mol. Genet.* **25**, 1754–1770 (2016).
- 600 4. Y. Xu, A. Malhotra, M. Ren, M. Schlame, The enzymatic function of tafazzin. *J. Biol.*  
601 *Chem.* **281**, 39217–39224 (2006).
- 602 5. P. Vreken, *et al.*, Defective remodeling of cardiolipin and phosphatidylglycerol in Barth  
603 syndrome. *Biochem. Biophys. Res. Commun.* **279**, 378–382 (2000).
- 604 6. W. Kulik, *et al.*, Bloodspot Assay Using HPLC – Tandem Mass Spectrometry for  
605 Detection of Barth Syndrome. *Clin. Chem.* **54**, 371–378 (2008).
- 606 7. P. G. Barth, *et al.*, An X-linked mitochondrial disease affecting cardiac muscle, skeletal  
607 muscle and neutrophil leucocytes. *J. Neurol. Sci.* **62**, 327–355 (1983).
- 608 8. C. Ferreira, R. Thompson, H. Vernon, "Barth Syndrome" in *GeneReviews®[Internet]*,  
609 1993rd–2018th Ed., M. P. Adam, H. H. Ardinger, R. A. Pagon, S. E. Wallace, Eds.  
610 (University of Washington, 2014) <https://doi.org/NBK247162> [bookaccession].
- 611 9. A. E. Roberts, *et al.*, The Barth Syndrome Registry: Distinguishing disease characteristics

- 612 and growth data from a longitudinal study. *Am. J. Med. Genet. Part A* **158 A**, 2726–2732  
613 (2012).
- 614 10. W. R. Thompson, *et al.*, New targets for monitoring and therapy in Barth syndrome.  
615 *Genet. Med.* **18**, 1001–1010 (2016).
- 616 11. E. J. Lesnefsky, Q. Chen, C. L. Hoppel, Mitochondrial Metabolism in Aging Heart. *Circ.*  
617 *Res.* **118**, 1593–1611 (2016).
- 618 12. S. M. Claypool, C. M. Koehler, The complexity of cardiolipin in health and disease.  
619 *Trends Biochem. Sci.* **37**, 32–41 (2012).
- 620 13. L. K. Cole, *et al.*, Impaired cardiolipin biosynthesis prevents hepatic steatosis and diet-  
621 induced obesity. *Diabetes* **65**, 3289–3300 (2016).
- 622 14. Z. Younossi, *et al.*, Global burden of NAFLD and NASH: Trends, predictions, risk factors  
623 and prevention. *Nat. Rev. Gastroenterol. Hepatol.* **15**, 11–20 (2018).
- 624 15. K. Pfeiffer, *et al.*, Cardiolipin Stabilizes Respiratory Chain Supercomplexes. *J. Biol.*  
625 *Chem.* **278**, 52873–52880 (2003).
- 626 16. M. Zhang, E. Mileykovskaya, W. Dowhan, Gluing the respiratory chain together:  
627 Cardiolipin is required for supercomplex formation in the inner mitochondrial membrane.  
628 *J. Biol. Chem.* **277**, 43553–43556 (2002).
- 629 17. M. McKenzie, M. Lazarou, D. R. Thorburn, M. T. Ryan, Mitochondrial Respiratory Chain  
630 Supercomplexes Are Destabilized in Barth Syndrome Patients. *J. Mol. Biol.* **361**, 462–469  
631 (2006).
- 632 18. D. W. Huang, B. T. Sherman, R. A. Lempicki, Systematic and integrative analysis of large  
633 gene lists using DAVID bioinformatics resources. *Nat. Protoc.* **4**, 44–57 (2009).
- 634 19. D. W. Huang, B. T. Sherman, R. A. Lempicki, Bioinformatics enrichment tools: Paths  
635 toward the comprehensive functional analysis of large gene lists. *Nucleic Acids Res.* **37**,  
636 1–13 (2009).
- 637 20. S. Guerrero-Castillo, *et al.*, The Assembly Pathway of Mitochondrial Respiratory Chain  
638 Complex I. *Cell Metab.* **25**, 128–139 (2017).
- 639 21. L. Stiburek, *et al.*, Knockdown of Human Oxa1l Impairs the Biogenesis of F1Fo-ATP  
640 Synthase and NADH:Ubiquinone Oxidoreductase. *J. Mol. Biol.* **374**, 506–516 (2007).
- 641 22. M. Spinazzi, B. De Strooper, PARL: The mitochondrial rhomboid protease. *Semin. Cell*  
642 *Dev. Biol.* **60**, 19–28 (2016).
- 643 23. G. Shi, G. A. McQuibban, The Mitochondrial Rhomboid Protease PARL Is Regulated by  
644 PDK2 to Integrate Mitochondrial Quality Control and Metabolism. *Cell Rep.* **18**, 1458–  
645 1472 (2017).



- 646 24. S. Saita, *et al.*, PARL mediates Smac proteolytic maturation in mitochondria to promote  
647 apoptosis. *Nat. Cell Biol.* **19**, 318–328 (2017).
- 648 25. C. Yang, *et al.*, Mitochondrial phosphatase PGAM5 regulates Keap1-mediated Bcl-xL  
649 degradation and controls cardiomyocyte apoptosis driven by myocardial  
650 ischemia/reperfusion injury. *Vitr. Cell. Dev. Biol. - Anim.* **53**, 248–257 (2017).
- 651 26. B. Wang, *et al.*, AMPK $\alpha$ 2 protects against the development of heart failure by enhancing  
652 mitophagy via PINK1 phosphorylation. *Circ. Res.* **122**, 712–729 (2018).
- 653 27. S. Shires, Å. B. Gustafsson, Regulating Renewable Energy: Connecting AMPK $\alpha$ 2 to  
654 PINK1/ Parkin-Mediated Mitophagy in the Heart. *Circ. Res.* **122**, 649–651 (2018).
- 655 28. C. Potting, *et al.*, TRIAP1/PRELI complexes prevent apoptosis by mediating  
656 intramitochondrial transport of phosphatidic acid. *Cell Metab.* **18**, 287–295 (2013).
- 657 29. X. Miliara, *et al.*, Structural determinants of lipid specificity within Ups/PRELI lipid transfer  
658 proteins. *Nat. Commun.* **10**, 1130 (2019).
- 659 30. L. Galluzzi, A. López-Soto, S. Kumar, G. Kroemer, Caspases Connect Cell-Death  
660 Signaling to Organismal Homeostasis. *Immunity* **44**, 221–231 (2016).
- 661 31. S. Sekine, *et al.*, Rhomboid protease PARL mediates the mitochondrial membrane  
662 potential loss-induced cleavage of PGAM5. *J. Biol. Chem.* **287**, 34635–34645 (2012).
- 663 32. Y. W. Lu, S. M. Claypool, Disorders of phospholipid metabolism: An emerging class of  
664 mitochondrial disease due to defects in nuclear genes. *Front. Genet.* **6** (2015).
- 665 33. A. Malhotra, *et al.*, Role of calcium-independent phospholipase A2 in the pathogenesis of  
666 Barth syndrome. *Proc. Natl. Acad. Sci.* **106**, 2337–2341 (2009).
- 667 34. H. H. Szeto, First-in-class cardiolipin-protective compound as a therapeutic agent to  
668 restore mitochondrial bioenergetics. *Br. J. Pharmacol.* **171**, 2029–50 (2014).
- 669 35. A. V. Birk, W. M. Chao, C. Bracken, J. D. Warren, H. H. Szeto, Targeting mitochondrial  
670 cardiolipin and the cytochrome c/cardiolipin complex to promote electron transport and  
671 optimize mitochondrial ATP synthesis. *Br. J. Pharmacol.* **171**, 2017–2028 (2014).
- 672 36. M. Zhang, E. Mileykovskaya, W. Dowhan, Cardiolipin is essential for organization of  
673 complexes III and IV into a supercomplex in intact yeast mitochondria. *J. Biol. Chem.*  
674 **280**, 29403–29408 (2005).
- 675 37. L. E. Formosa, M. G. Dibley, D. A. Stroud, M. T. Ryan, Building a complex complex:  
676 Assembly of mitochondrial respiratory chain complex I. *Semin. Cell Dev. Biol.* **76**, 154–  
677 162 (2018).
- 678 38. A. Picca, *et al.*, Mitochondrial quality control mechanisms as molecular targets in cardiac  
679 ageing. *Nat. Rev. Cardiol.* **15**, 543–554 (2018).

- 680 39. F. Fischer, A. Hamann, H. D. Osiewacz, Mitochondrial quality control: An integrated  
681 network of pathways. *Trends Biochem. Sci.* **37**, 284–292 (2012).
- 682 40. H. B. Suliman, C. A. Piantadosi, Mitochondrial quality control as a therapeutic target.  
683 *Pharmacol. Rev.* **68**, 20–48 (2016).
- 684 41. G. W. Dorn, Mitochondrial dynamism and heart disease: changing shape and shaping  
685 change. *EMBO Mol. Med.* **7**, 865–77 (2015).
- 686 42. D. A. Stroud, *et al.*, Accessory subunits are integral for assembly and function of human  
687 mitochondrial complex i. *Nature* **538**, 123–126 (2016).
- 688 43. A. Brown, *et al.*, Structures of the human mitochondrial ribosome in native states of  
689 assembly. *Nat. Struct. Mol. Biol.* **24**, 866–869 (2017).
- 690 44. S. L. N. Clarke, *et al.*, Barth Syndrome. *Orphanet J. Rare Dis.* **8** (2013).
- 691 45. S. Lavandro, M. Chiong, B. A. Rothermel, J. A. Hill, Autophagy in cardiovascular  
692 biology. *J. Clin. Invest.* **125**, 55–64 (2015).
- 693 46. E. Lee, *et al.*, Autophagy is essential for cardiac morphogenesis during vertebrate  
694 development. *Autophagy* **10**, 572–87 (2014).
- 695 47. A. Saric, K. Andreau, A. S. Armand, I. M. Møller, P. X. Petit, Barth syndrome: From  
696 mitochondrial dysfunctions associated with aberrant production of reactive oxygen  
697 species to pluripotent stem cell studies. *Front. Genet.* **6**, 359 (2016).
- 698 48. D. V. Jeyaraju, H. M. McBride, R. B. Hill, L. Pellegrini, Structural and mechanistic basis of  
699 Parl activity and regulation. *Cell Death Differ.* **18**, 1531–1539 (2011).
- 700 49. L. Ozgyin, A. Horvath, Z. Hevessy, B. L. Balint, Extensive epigenetic and transcriptomic  
701 variability between genetically identical human B-lymphoblastoid cells with implications in  
702 pharmacogenomics research. *Sci. Rep.* **9**, 4889 (2019).
- 703 50. F. A. Ran, *et al.*, Genome engineering using the CRISPR-Cas9 system. *Nat. Protoc.*  
704 (2013) <https://doi.org/10.1038/nprot.2013.143>.
- 705 51. P. D. Hsu, *et al.*, DNA targeting specificity of RNA-guided Cas9 nucleases. *Nat.*  
706 *Biotechnol.* **31**, 827–832 (2013).
- 707 52. F. M. Vaz, *et al.*, Mutations in PCYT2 disrupt etherlipid biosynthesis and cause a complex  
708 hereditary spastic paraplegia. *Brain* **142**, 3382–3397 (2019).
- 709 53. S. M. Claypool, Y. Oktay, P. Boontheung, J. A. Loo, C. M. Koehler, Cardiolipin defines  
710 the interactome of the major ADP/ATP carrier protein of the mitochondrial inner  
711 membrane. *J. Cell Biol.* **182**, 937–950 (2008).
- 712 54. A. Elgogary, *et al.*, Combination therapy with BPTES nanoparticles and metformin targets  
713 the metabolic heterogeneity of pancreatic cancer. *Proc. Natl. Acad. Sci. U. S. A.* **113**,

- 714 E5328–E5336 (2016).
- 715 55. T. Nguyen, *et al.*, Uncovering the Role of N-Acetyl-Aspartyl-Glutamate as a Glutamate  
716 Reservoir in Cancer. *Cell Rep.* **27**, 491–501 (2019).
- 717 56. R Core Team, R: A language and environment for statistical computing.No Title (2016).
- 718

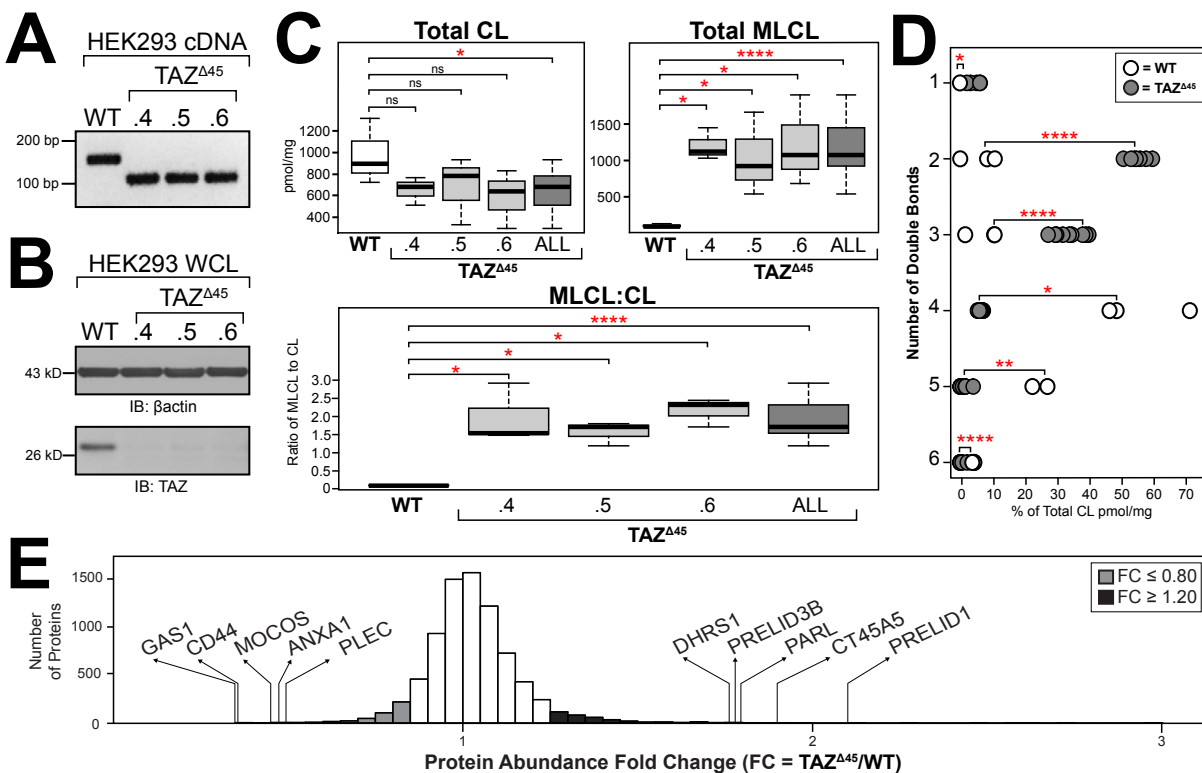

719  
 720 **Figure 1. *TAZ*<sup>445</sup> HEK293 genetic characterization, CL profiling and proteomics analysis.**  
 721 **(A)** RT-PCR of RNA extracted from the HEK293 *TAZ*<sup>445</sup> clones using primers specific to the region  
 722 of *TAZ* being edited. **(B)** Whole cells lysate (45ug) of the indicated lines immunoblotted for *TAZ*  
 723 and loading control  $\beta$ -actin. **(C)** The abundance of CL and MLCL in WT (n=3) and *TAZ*<sup>445</sup> clones  
 724 (n=3, per clone) was determined by shotgun lipidomics via mass spectrometry. **(D)** The  
 725 distribution of double bonds across CL species was determined as a percentage of total CL. **(E)**  
 726 7713 proteins were identified and quantified with TMT 10-plex mass spectrometry of whole cell  
 727 lysate (200ug) of *TAZ*<sup>445</sup> (n=3) and WT cells (n=3). Protein abundance fold change (FC) calculated  
 728 by dividing the average abundance per protein identified in *TAZ*<sup>445</sup> cells by WT average  
 729 abundance per protein. The genes that encode the most significantly reduced proteins in *TAZ*<sup>445</sup>  
 730 cells are *GAS1* (FC=0.35, p=2.5 x 10<sup>-4</sup>), *CD44* (FC=0.367, p=6.6 x 10<sup>-4</sup>), *MOCOS* (FC=0.45,  
 731 p=0.011), *ANAX1* (FC=0.478, p=0.01) , and *PLEC* (FC=0.491, p=2.7 x 10<sup>-4</sup>). The genes that  
 732 encode the most significantly increased proteins in *TAZ*<sup>445</sup> cells are *PRELID1* (FC=2.125, p=8.4  
 733 x 10<sup>-4</sup>), *CT45A5* (FC=1.909, p=0.023), *PARL* (FC=1.815, p=0.016), *PRELID3B* (FC=1.795, p=3.9  
 734 x 10<sup>-4</sup>), and *DHRS1* (FC=1.774, p=0.016). Proteins with a fold change (FC)  $\leq$  0.80 are highlighted  
 735 in grey (n=215) and proteins with a FC  $\geq$  1.20 are highlighted in black (n=621). Significant  
 736 differences are indicated; \*  $\leq$  0.05, \*\*  $\leq$  0.005, \*\*\*  $\leq$  0.0005, \*\*\*\*  $\leq$  0.00005.

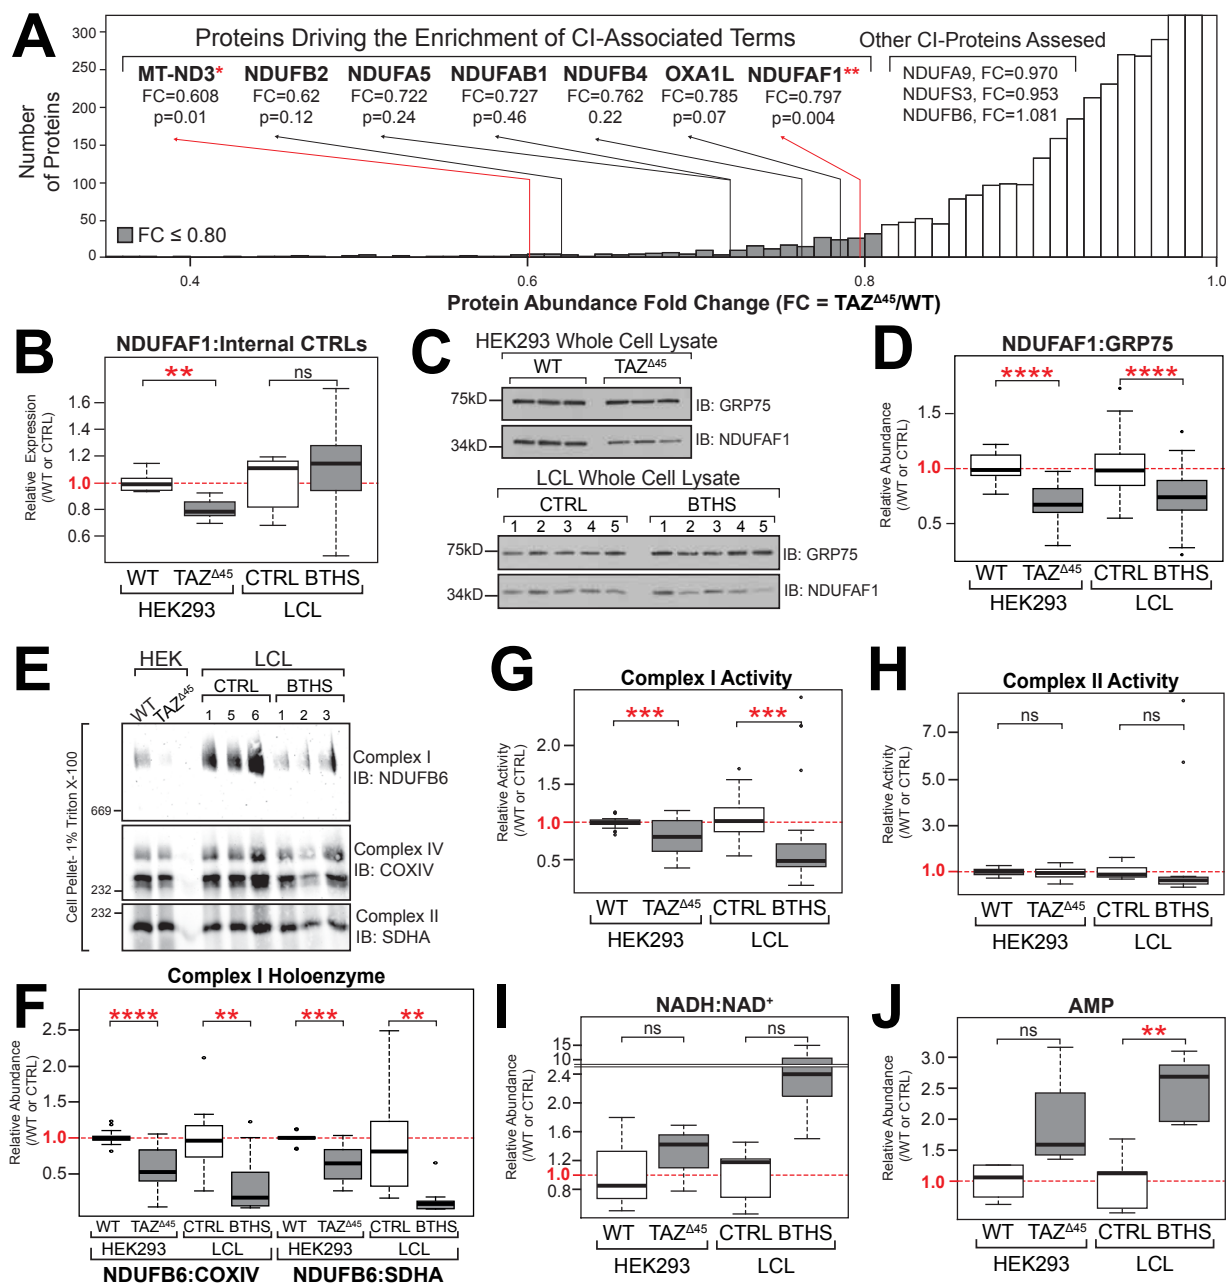

737  
 738 **Figure 2. Reduced complex I (CI) holoenzyme abundance and activity in HEK293  $TAZ^{\Delta 45}$**   
 739 **cells and BTHS patient-derived lymphoblastoid cells. (A)** The enrichment of the CI-associated  
 740 terms is driven by 7 genes; *MT-ND3*, *NDUFAF1*, *NDUFA5*, *NDUFAB1*, *NDUFB2*, *NDUFB4*,  
 741 *OXA1L*. **(B)** Relative mRNA expression of *NDUFAF1*, determined by qRT-PCR and  $\Delta\Delta C_T$   
 742 quantification. Data plotted relative to WT/CTRL expression; WT n=6,  $TAZ^{\Delta 45}$  n=6, CTRL n=10,  
 743 BTHS n=15. **(C)** Whole cell lysate (45 ug) of the indicated lines were immunoblotted for the  
 744 indicated proteins. **(D)** Band intensities, relative to the loading control GRP75, were quantified  
 745 and plotted relative to WT/CTRL abundance; WT n=27,  $TAZ^{\Delta 45}$  n=26, CTRL n=49, BTHS n=48.

746 **(E)** BN-PAGE of HEK293 WT and  $TAZ^{\Delta 45}$  or CTRL and BTHS LCL cells (100-250K cells)  
747 solubilized in 1% Triton X-100 immunoblotted for the indicated proteins. **(F)** Band intensities were  
748 quantified, and CI abundance was represented as the ratio of CI band intensity to CIV (COXIV)  
749 or CII (SDHA). Abundance was plotted relative to WT/CTRL abundance; CI:CIV(WT n=13,  $TAZ^{\Delta 45}$   
750 n=16, CTRL n=12, BTHS n=12), CI:CII (WT n=10,  $TAZ^{\Delta 45}$  n=13, CTRL n=9, BTHS n=9). **(G)** CI  
751 activity measured in HEK293 WT and  $TAZ^{\Delta 45}$  or CTRL and BTHS LCLs mitochondria (200 ug total  
752 protein) on a microplate reader (450nm) by following the oxidation of NADH to oxidized  
753 nicotinamide adenine dinucleotide (NAD<sup>+</sup>). Activity plotted relative to WT/CTRL abundance; WT  
754 n=25,  $TAZ^{\Delta 45}$  n=26, CTRL n=36, BTHS n=42. **(H)** CII activity measured in HEK293 WT and  $TAZ^{\Delta 45}$   
755 or CTRL and BTHS LCLs mitochondria (200 ug total protein) on a microplate reader by following  
756 the production of ubiquinol by CII coupled to the reduction of the dye diclorophenolindophenol  
757 (DCPIP, 600nm). Activity plotted relative to WT/CTRL abundance; WT n=12,  $TAZ^{\Delta 45}$  n=12, CTRL  
758 n=10, BTHS n=12. Targeted metabolomics was used to measured **(I)** NADH, NAD<sup>+</sup>, and **(J)**  
759 cellular AMP via mass spectrometry in HEK293 WT (n=3), HEK293  $TAZ^{\Delta 45}$  (n=3), CTRL LCL  
760 (n=5) and BTHS LCL (n=5) cells. Significant differences are indicated; \*  $\leq$  0.05, \*\*  $\leq$  0.005, \*\*\*  $\leq$   
761 0.0005, \*\*\*\*  $\leq$  0.00005.



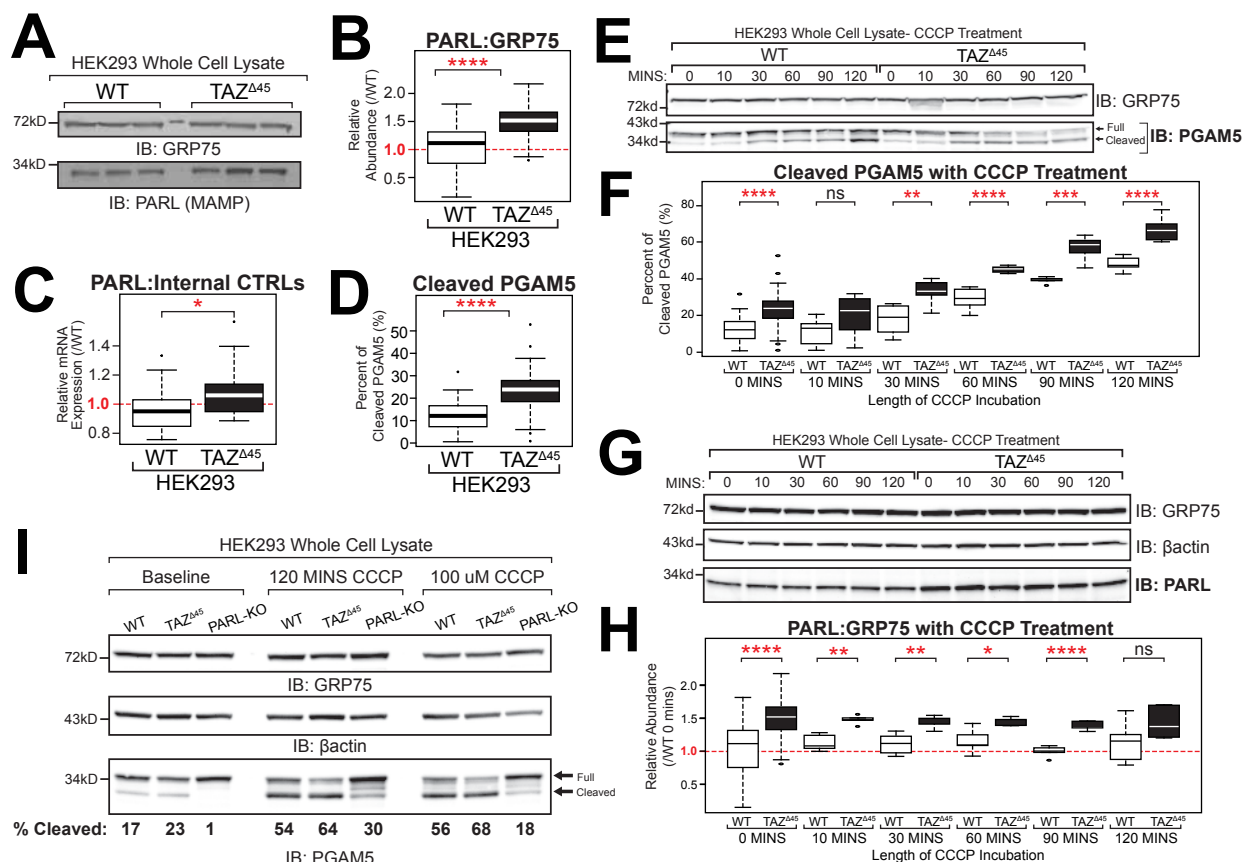

762  
763 **Figure 3. Increased cleavage of PGAM5 by PARL in HEK293TAZ<sup>Δ45</sup> cells.** (A) Whole cell  
764 lysate (45 ug) of the indicated lines were immunoblotted for the indicated proteins. (B) Band  
765 intensities, relative to loading control GRP75, were quantified and plotted relative to WT  
766 abundance; WT n=54, TAZ<sup>Δ45</sup> n=48 (C) Relative mRNA expression of *PARL* determined by qRT-  
767 PCR and  $\Delta\Delta C_T$  quantification; WT n=18, TAZ<sup>Δ45</sup> n=17. (D) Whole cell lysate (45 ug) of WT and  
768 TAZ<sup>Δ45</sup> cells were immunoblotted for PGAM5 and loading control GRP75. Band intensities,  
769 relative to the loading control GRP75, for both full-length and cleaved PGAM5 were individually  
770 quantified and plotted as the percent of cleaved PGAM5 (cleaved/full+cleaved); WT n=41, TAZ<sup>Δ45</sup>  
771 n=41. (E) HEK293 WT and TAZ<sup>Δ45</sup> cells were treated with 20uM CCCP for serial time points from  
772 0 to 120 minutes. Whole cell lysate (45 ug) of the indicated lines and treatment times were  
773 immunoblotted for the indicated proteins. (F) Band intensities, relative to the loading control  
774 GRP75, for both full-length and cleaved PGAM5 were individually quantified and plotted as the  
775 percent of cleaved PGAM5 (cleaved/full+cleaved); WT 0 mins n=41, WT 10 mins n=8, WT 30  
776 mins n=8, WT 60 mins n=8, WT 90 mins n=5, WT 120 mins n=7, TAZ<sup>Δ45</sup> 0 mins n=41, TAZ<sup>Δ45</sup> 10  
777 mins n=8, TAZ<sup>Δ45</sup> 30 mins n=7, TAZ<sup>Δ45</sup> 60 mins n=5, TAZ<sup>Δ45</sup> 90 mins n=7, TAZ<sup>Δ45</sup> 120 mins n=7.  
778 (G) HEK293 WT and TAZ<sup>Δ45</sup> cells were treated with 20uM CCCP for serial time points from 0 to

779 120 minutes. Whole cell lysate (45 ug) of the indicated lines and treatment times were  
780 immunoblotted for the indicated proteins. **(H)** Band intensities, relative to the loading control  
781 GRP75, were quantified and plotted relative to WT abundance; WT 0 mins n=54, WT 10 mins  
782 n=5, WT 30 mins n=6, WT 60 mins n=6, WT 90 mins n=5, WT 120 mins n=6,  $TAZ^{\Delta 45}$  0 mins n=48,  
783  $TAZ^{\Delta 45}$  10 mins n=5,  $TAZ^{\Delta 45}$  30 mins n=5,  $TAZ^{\Delta 45}$  60 mins n=5,  $TAZ^{\Delta 45}$  90 mins n=5,  $TAZ^{\Delta 45}$  120  
784 mins n=6. **(I)** Whole cell lysate (45 ug) of the indicated lines were immunoblotted for the indicated  
785 proteins. Band intensities, relative to the loading control GRP75, for both full-length and cleaved  
786 PGAM5 were individually quantified, and the percent of cleaved PGAM5 (cleaved/full+cleaved) is  
787 indicated for each lane (n=1). Significant differences are indicated; \*  $\leq 0.05$ , \*\*  $\leq 0.005$ , \*\*\*  $\leq$   
788 0.0005, \*\*\*\*  $\leq 0.00005$ .  
789

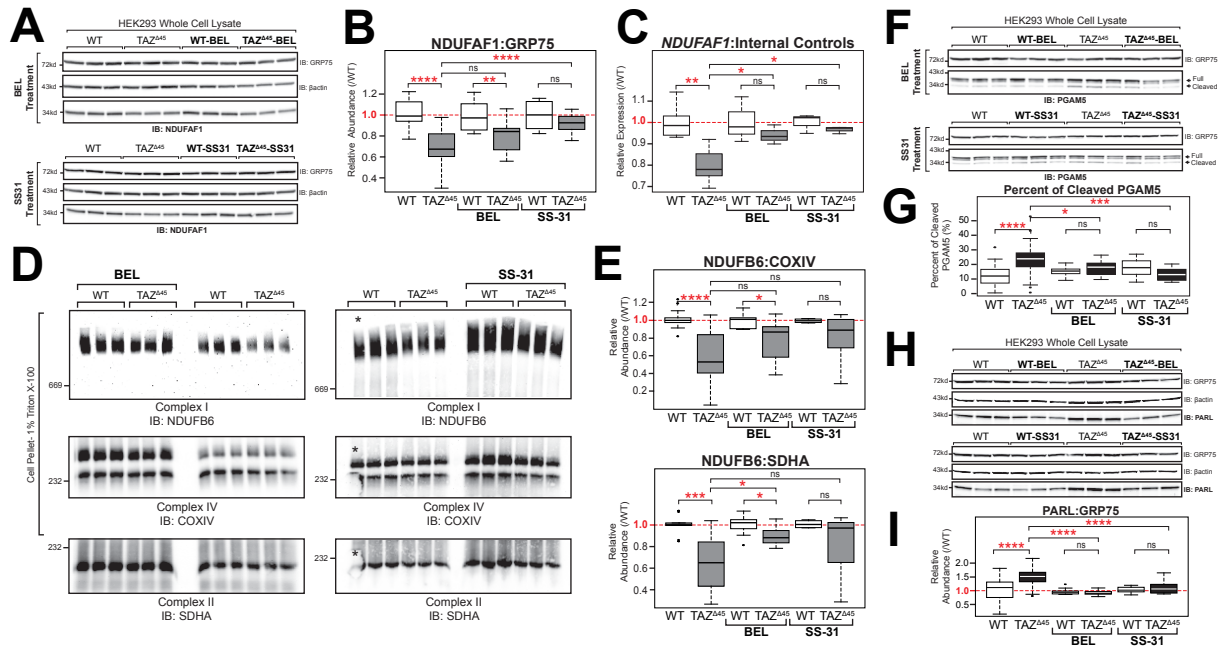

790

791 **Figure 4. Targeting CL or CL metabolism with bromoenol lactone and SS-31 modifies**

792 **mitochondrial dysfunction. (A)** HEK293 WT and  $TAZ^{\Delta 45}$  cells were treated for 48 hours with

793 2.5uM bromoenol lactone (BEL) and 7 days with 100nM SS-31. Whole cell lysate (40-45 ug) of

794 the indicated lines were immunoblotted for the indicated proteins. **(B)** Band intensities, relative to

795 the loading control GRP75, were quantified and plotted relative to WT abundance; WT n=27,

796  $TAZ^{\Delta 45}$  n=26, WT-BEL n=9,  $TAZ^{\Delta 45}$ -BEL n=9, WT-SS-31 n=9,  $TAZ^{\Delta 45}$ -SS-31 n=9. **(C)** Relative

797 mRNA expression of *NDUFAF1* determined by qRT-PCR and  $\Delta\Delta C_T$  quantification using each

798 respective control; WT n=6,  $TAZ^{\Delta 45}$  n=3, WT-BEL n=3,  $TAZ^{\Delta 45}$ -BEL n=3, WT-SS-31 n=3,  $TAZ^{\Delta 45}$ -

799 SS-31 n=3 per gene. **(D)** BN-PAGE of HEK293 WT and  $TAZ^{\Delta 45}$  cells treated for 48 hrs with 2.5uM

800 BEL (120 ug total protein) and 7 days with 100nM SS-31 solubilized in 1% Triton X-100

801 immunoblotted for the indicated proteins. All samples were resolved on a single gel and exposed

802 for the same duration. The WT lane indicated with the asterisk was not used for quantification due

803 to air bubbles. **(E)** Band intensities were quantified, and CI abundance was represented as the

804 ratio of CI band intensity to CIV or CII. Abundance was plotted relative to respective control;

805 CI:CIV(WT n=13,  $TAZ^{\Delta 45}$  n=16, WT-BEL n=9,  $TAZ^{\Delta 45}$ -BEL n=11, WT-SS-31 n=4,  $TAZ^{\Delta 45}$ -SS-31

806 n=6), CI:CII (WT n=10,  $TAZ^{\Delta 45}$  n=13, WT-BEL n=9,  $TAZ^{\Delta 45}$ -BEL n=10, WT-SS-31 n=4,  $TAZ^{\Delta 45}$ -

807 SS-31 n=6). **(F)** Whole cell lysate (40-45 ug) of the indicated lines and treatment conditions were

808 immunoblotted for the indicated proteins. **(G)** Band intensities, relative to the loading control

809 GRP75, for both full-length and cleaved PGAM5 were individually quantified and plotted as the

810 percent of cleaved PGAM5 (cleaved/full+cleaved); WT n=41,  $TAZ^{\Delta 45}$  n=41, WT-BEL n=16,

811 *TAZ<sup>Δ45</sup>*-BEL n=16, WT-SS-31 n=9, *TAZ<sup>Δ45</sup>*-SS-31 n=8. **(H)** Whole cell lysate (40-45 ug) of the  
812 indicated lines and treatment conditions were immunoblotted for the indicated proteins. **(I)** Band  
813 intensities, relative to the loading control GRP75, were quantified and plotted relative to WT  
814 abundance; WT n=54, *TAZ<sup>Δ45</sup>* n=48, WT-BEL n=11, *TAZ<sup>Δ45</sup>*-BEL n=11, WT-SS-31 n=10, *TAZ<sup>Δ45</sup>*-  
815 SS-31 n=12. Significant differences are indicated; \* ≤ 0.05, \*\* ≤ 0.005, \*\*\* ≤ 0.0005, \*\*\*\* ≤ 0.00005.  
816
